# Supplementary material for: Antimicrobial activity of graphene oxide quantum dots: impacts of chemical reduction
Source: PubMed Central journal article supplement — Nanoscale Adv. 2020 Jan 20;2(3):1074–83. doi: 10.1039/c9na00698b (PMC9417586; doi:10.1039/c9na00698b), 2020-01-20
Supplement: NA-002-C9NA00698B-s001.pdf [file NA-002-C9NA00698B-s001.pdf]

Supporting Information

## Antimicrobial Activity of Graphene Oxide Quantum Dots: Impacts of Chemical Reduction

Mauricio D. Rojas-Andrade,<sup>a</sup> Tuan Anh Nguyen,<sup>a</sup> William P. Mistler,<sup>a</sup> Juan Armas,<sup>a</sup> Jia En Lu,<sup>a</sup> Graham Roseman,<sup>a</sup> William R. Hollingsworth,<sup>a</sup> Forrest Nichols,<sup>a</sup> Glenn L. Millhauser,<sup>a</sup> Alexander Ayzner,<sup>a</sup> Chad Saltikov,<sup>b,\*</sup> and Shaowei Chen<sup>a,\*</sup>

<sup>a</sup> Department of Chemistry and Biochemistry, <sup>b</sup> Department of Microbiology and Environmental Toxicology, University of California, 1156 High Street, Santa Cruz, California 95064 USA

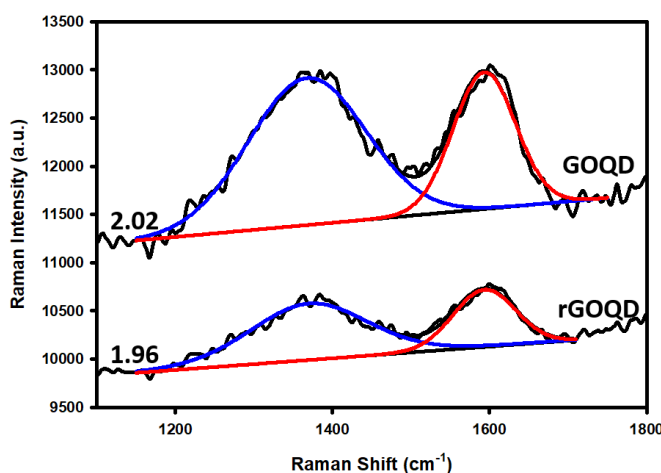

**Figure S1.** Raman spectra of GOQD and rGOQD. D/G ratios in terms of integrated peak area are given above each fitting.

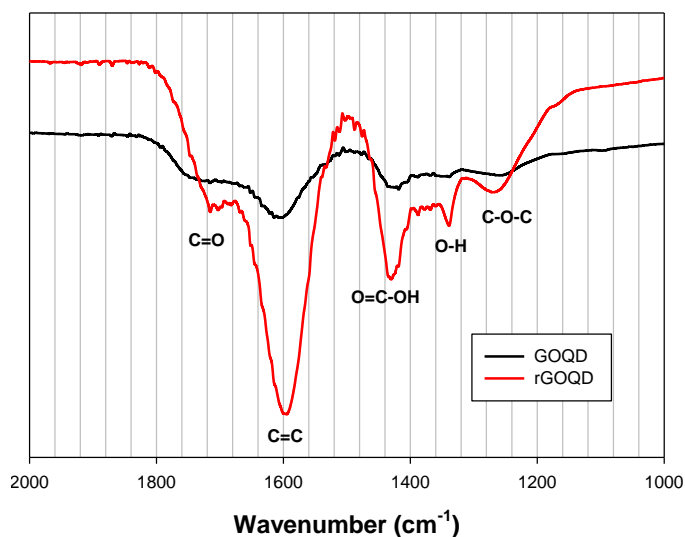

**Figure S2.** FTIR Spectra of GOQD and rGOQD.

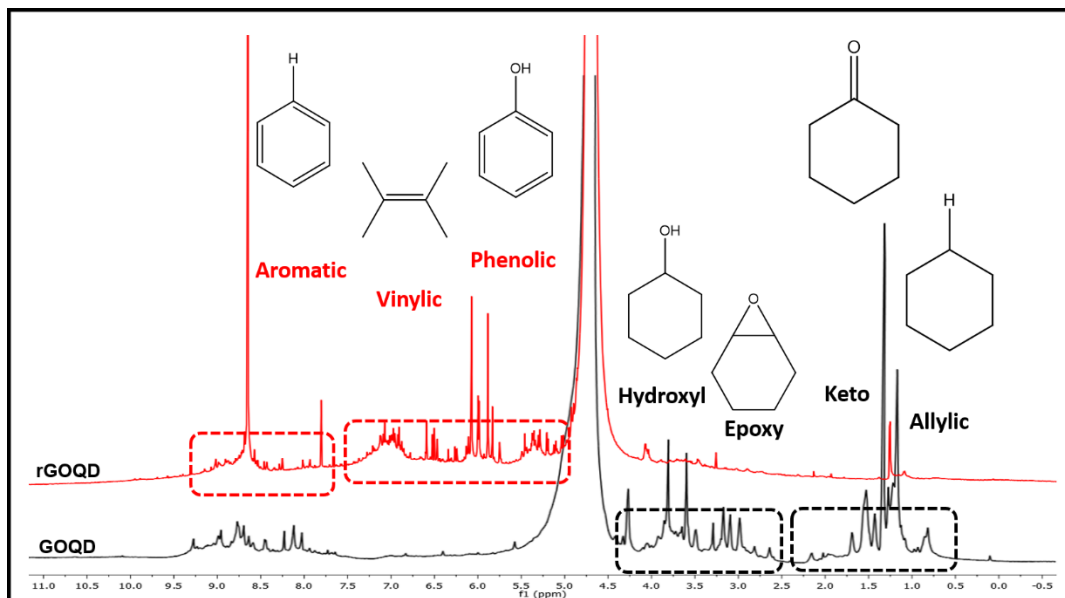

**Figure S3.**  $^1\text{H}$  NMR spectra of GOQD and rGOQD. Regions with functional groups of interest are highlighted and their assignments noted above. One can see that the aromatic  $=\text{C}-\text{H}$  signals are markedly stronger with the rGOQD sample than with the GOQDs, suggesting formation of an increasing fraction of  $\text{sp}^2$  carbon in the carbon matrix.

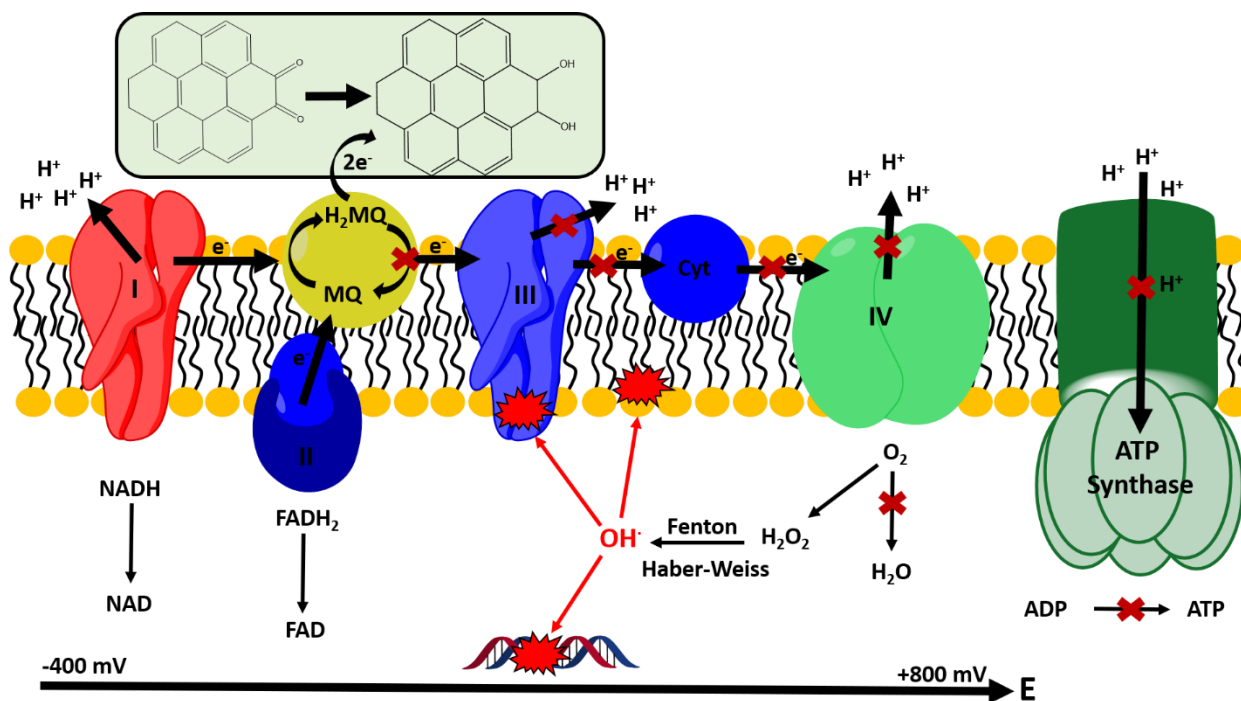

**Figure S4.** Proposed mechanism of cytotoxicity by phenanthroquinone-like moieties.

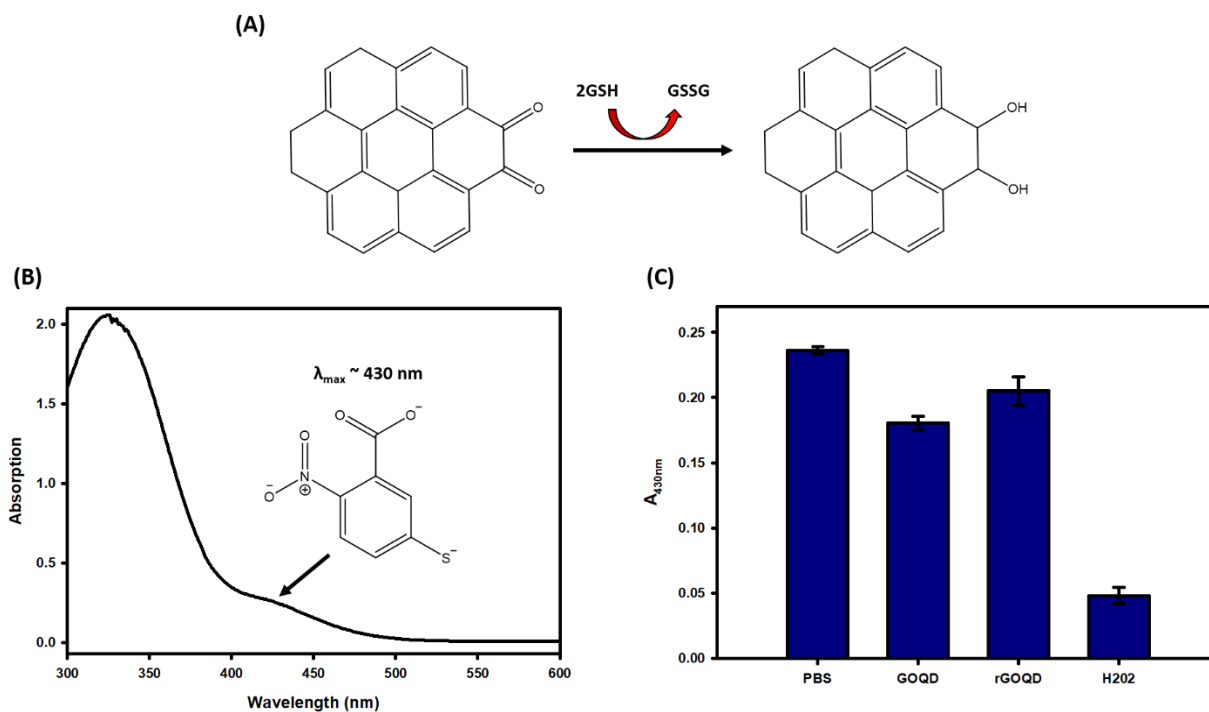

**Figure S5.** Ellman's assay with GOQD and rGOQD. (A) Proposed mechanism of glutathione (GSH) oxidation by phenanthroquinone moieties. (B) Representative UV-vis spectra of the PBS control highlighting the absorption band originating from DNB<sup>2-</sup>. (C) Bar chart of the absorbance at 430 nm after incubation with PBS (pH=7.4), H<sub>2</sub>O<sub>2</sub>, GOQD, and rGOQD solutions for 30 min.

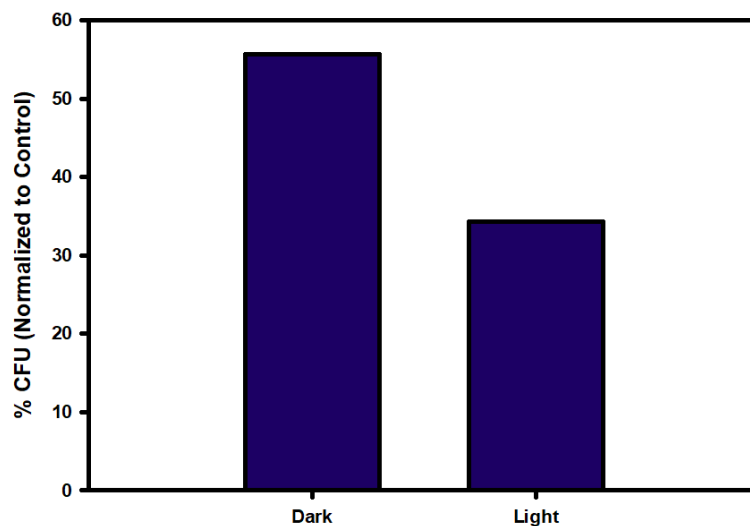

**Figure S6.** Comparison of viability changes of cells suspended in 1 mg/mL GOQD solution after 3 min in the dark and under photoirradiation.

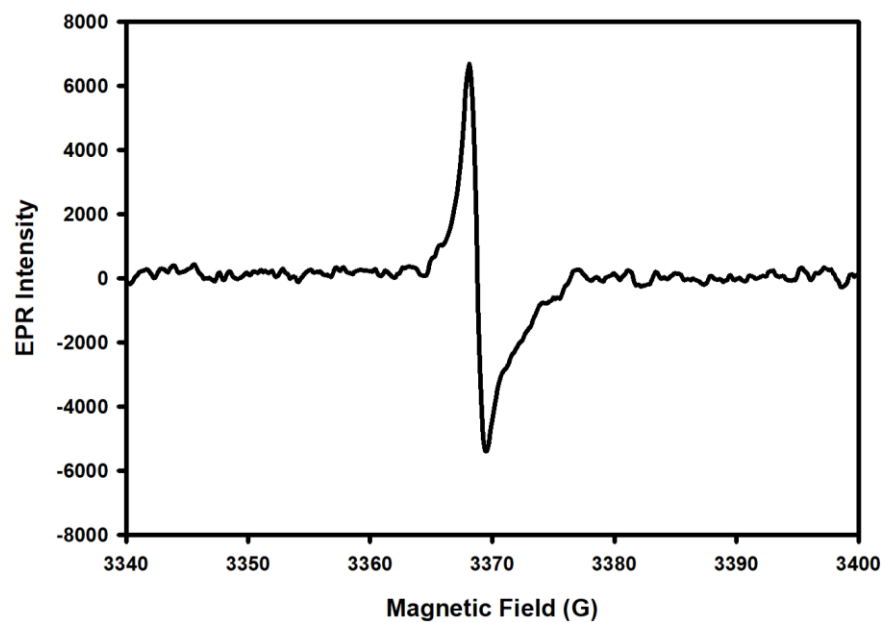

**Figure S7.** EPR spectrum of GOQD in water (1 mg/mL) in the absence of DMPO.

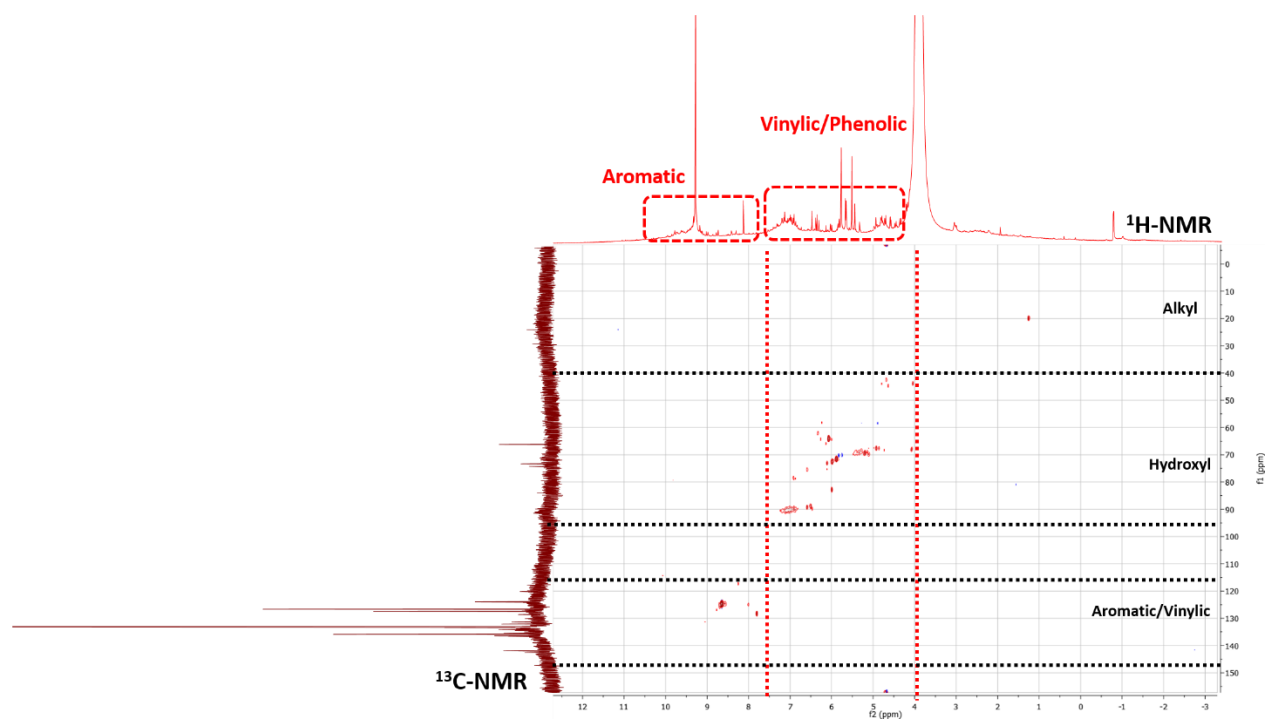

**Figure S8.**  $^{13}\text{C}$ - $^1\text{H}$  HSQC spectrum for rGOQD. Relevant functional groups are highlighted in both  $^1\text{H}$  NMR and  $^{13}\text{C}$  NMR spectra, and dotted lines show the correlation regions.

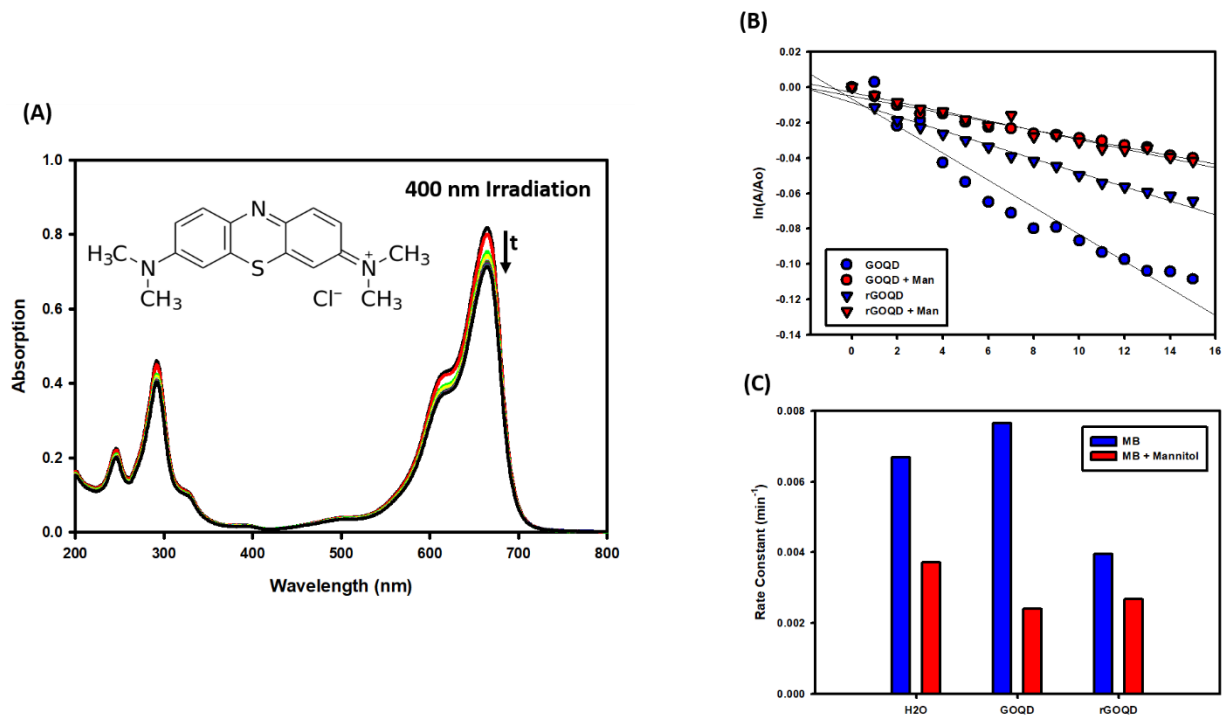

**Figure S9.** Methylene blue photocatalytic degradation in the presence of GOQD and rGOQD solutions. (A) Absorption spectra during photocatalytic degradation over a 15 min time period. (B) Plots of  $\ln(A/A_0)$  vs time, where slopes of the linear regression yield the degradation rate constants ( $k_{deg}$ ), and (C) comparison of the values of  $k_{deg}$  in methylene blue and methylene blue + 10 mM mannitol solutions catalyzed in the absence and presence of GOQD and rGOQD.
